# Supplementary material for: Multidrug-resistant bacteria compensate for the epistasis between resistances
Source: PLoS Biol. 2017 Apr 18;15(4):e2001741. doi: 10.1371/journal.pbio.2001741 (PMC5395140; doi:10.1371/journal.pbio.2001741)
Supplement: S1 Table — Mutations are shown for the 3 different resistant backgrounds, along with the frequency at which they were detected. Mutations in known compensatory targets are marked in bold. (XLSX) [file pbio.2001741.s009.xlsx]

## Sheet: H526Y
Genome Position	Gene(s)	Mutation	Region	Frequency
897,450	ybjO	T→C	I80T (ATC→ACC)	0.061
1,720,637	ydhK	Δ3 bp	coding	0.01
1,876,095	yeaP	A→G	G119G (GGA→GGG)	0.076
2,438,935	fabB	Δ135 bp	coding	0.014
3,056,065	serA	Δ3 bp	coding	0.07
3,438,465	rpoA	G→A	T196I (ACC→ATC)	0.165
4,179,832	rpoB	G→A	D189N (GAT→AAT)	0.103
4,180,843		T→C	Y526H (TAC→CAC)	0.191
4,180,886		G→A	R540H (CGT→CAT)	0.056
4,182,538		G→A	G1091S (GGT→AGT)	0.064
4,182,629		C→T	A1121V (GCG→GTG)	0.074
4,184,672	rpoC	A→C	I434L (ATC→CTC)	0.089
4,184,721		A→C	H450P (CAC→CCC)	0.072
4,186,458		C→T	T1029I (ACC→ATC)	0.077
4,187,043		G→A	R1224H (CGT→CAT)	0.06
4,537,292	nanC	A→G	V78A (GTT→GCT)	0.097

## Sheet: K43T
Genome Position	Gene(s)	Mutation	Region	Frequency
751,564	ybgD	G→A	S152L (TCA→TTA)	0.066
1,868,555	yeaI	T→C	G49G (GGT→GGC)	0.072
1,894,732	nudL	T→G	I180R (ATA→AGA)	0.063
1,977,514	insA/uspC	IS1 (+) +9 bp	intergenic (‑275/‑255)	0.483
2,305,001	yojI	G→C	T546R (ACG→AGG)	0.084
3,281,366	kbaY	G→A	A68T (GCC→ACC)	0.092
3,350,771	arcB	Δ42 bp	coding (236‑277/2337 nt)	6.3%/8.7%
3,442,923	rpsE	G→A	A110V (GCA→GTA)	0.077
3,468,261	tufA	A→T	I364N (ATC→AAC)	0.182
4,122,178	cytR	A→C	L101R (CTG→CGG)	0.07
4,122,338		C→G	A48P (GCC→CCC)	0.07
4,122,434		C→T	A16T (GCC→ACC)	0.088
4,178,694	rplL	Δ6 bp	coding (112‑117/366 nt)	17%/14.8%
4,424,464	rplI	A→C	K112Q (AAG→CAG)	0.084
4,638,061	arcA	A→G	I90T (ATT→ACT)	0.087

## Sheet: H526Y-K43T
Genome Position	Gene(s)	Mutation	Region	Frequency
22,409	ileS	A→C	T7P (ACC→CCC)	0.082
134,997	speD	Δ150 bp	coding (437‑586/795 nt)	0.034
231,469	yafD	A→G	A116A (GCA→GCG)	0.036
501,096	ybaL	A→C	L456R (CTG→CGG)	0.018
695,730	[glnV]	Δ111 bp	intergenic-glnV-intergenic	0.037
765,459	mngA	G→A	V85M (GTG→ATG)	0.093
965,210	ycaI	C→T	S556S (AGC→AGT)	0.054
985,489	ompF	A→G	G239G (GGT→GGC)	0.049
1,319,447	trpE	G→A	R508R (CGC→CGT)	0.054
1,324,623	yciQ	Δ36 bp	coding (1854‑1889/1896 nt)	0.023
1,364,027	puuE	G→A	A152T (GCG→ACG)	0.041
1,457,453	paaH	A→G	T126A (ACC→GCC)	0.057
1,555,702	ddpF	A→G	L121L (TTG→CTG)	0.066
1,803,390	ydiY	T→C	T240A (ACC→GCC)	0.056
1,930,731	eda	A→G	V17A (GTT→GCT)	0.05
1,977,418	insA/uspC	IS1 (+) +8 bp	intergenic (‑179/‑352)	0.126
2,149,881	yegK	T→C	T206A (ACC→GCC)	0.073
2,173,375	gatZ	C→T	P323P (CCG→CCA)	0.068
2,236,388	mglA	IS1 (+) +9 bp	coding (916‑924/1521 nt)	0.063
2,236,609		IS1 (+) +9 bp	coding (695‑703/1521 nt)	0.03
2,237,280	mglA	+C	coding (32/1521 nt)	0.087
2,237,521	mglB	G→A	Q284* (CAG→TAG)	0.035
2,238,169		G→A	Q68* (CAG→TAG)	0.047
2,238,178		G→A	Q65* (CAG→TAG)	0.034
2,346,145	nrdB	A→G	Q247R (CAG→CGG)	0.042
2,445,777	prmB	A→C	L229R (CTG→CGG)	0.044
2,670,498	hcaD	G→A	E144K (GAA→AAA)	0.023
2,759,683	yfjK	A→G	V627A (GTG→GCG)	0.036
3,209,504	dnaG	T→C	F126L (TTT→CTT)	0.037
3,273,728	garD	T→C	V142A (GTC→GCC)	0.045
3,438,854	rpoA	A→C	H66Q (CAT→CAG)	0.046
3,439,442	rpsD	T→C	T86A (ACC→GCC)	0.057
3,439,550		C→A	D50Y (GAC→TAC)	0.034
3,442,927	rpsE	C→G	G109R (GGT→CGT)	0.055
3,442,945		T→G	T103P (ACC→CCC)	0.028
3,451,341	rpsJ / gspB	A→G	intergenic (‑49/+189)	0.039
3,468,261	tufA	A→T	I364N (ATC→AAC)	0.104
3,961,252	gpp	G→T	A334E (GCG→GAG)	0.05
3,977,997	wecG	G→A	A7T (GCA→ACA)	0.04
4,032,002	trkH	G→T	G279C (GGC→TGC)	0.039
4,175,194	tufB / secE	T→C	intergenic (+43/‑187)	0.038
4,178,694	rplL	Δ6 bp	coding (112‑117/366 nt)	0.05
4,180,843	rpoB	T→C	Y526H (TAC→CAC)	0.065
4,181,500		G→A	E745K (GAA→AAA)	0.106
4,182,295		Δ9 bp	coding (3028‑3036/4029 nt)	0.038
4,185,654	rpoC	C→A	A761E (GCG→GAG)	0.035
4,185,723		C→T	A784V (GCG→GTG)	0.04
4,186,209		C→T	A946V (GCT→GTT)	0.019
4,186,461		A→C	E1030A (GAA→GCA)	0.267
4,186,748		C→A	Q1126K (CAG→AAG)	0.261
4,186,991		G→T	G1207C (GGT→TGT)	0.026
4,187,115		T→C	I1248T (ATT→ACT)	0.036
4,305,980	alsE	A→G	G174G (GGT→GGC)	0.058
4,310,594	rpiR	C→G	A141P (GCC→CCC)	0.038
4,397,222	mutL	Δ1 bp	coding (1788/1848 nt)	0.036
4,510,243	fecD	Δ111 bp	coding (85‑195/957 nt)	0.01
4,587,664	yjiY	A→G	W547R (TGG→CGG)	0.058

## Sheet: H526Y-K43T D5
Genome Position	Gene(s)	Mutation	Region	Frequency	Found at day 22?
348,216	prpB	+GA	coding (311/891 nt)	0.02	No
722,320	kdpD	Δ3 bp	coding (1316‑1318/2685 nt)	0.02	No
1,717,161	anmK	C→T	L156L (CTG→TTG)	0.025	No
1,977,418	insA/uspC	IS1 (+) +8 bp	intergenic (‑179/‑352)	0.052	Yes (12.6%)
2,017,048	fliK	G→A	P213P (CCG→CCA)	0.022	No
3,438,854	rpoA	A→C	H66Q (CAT→CAG)	0.068	Yes (4.6%)
3,442,945	rpsE	T→G	T103P (ACC→CCC)	0.08	Yes (2.8%)
3,637,117	pitA	Δ11 bp	coding (1453‑1463/1500 nt)	0.05	No
3,878,793	recF	G→T	W151L (TGG→TTG)	0.025	No
4,133,374	katG	C→T	A506V (GCC→GTC)	0.02	No
4,181,500	rpoB	G→A	E745K (GAA→AAA)	0.03	Yes (10.6%)
4,185,723	rpoC	C→T	A784V (GCG→GTG)	0.08	Yes (4%)
4,186,461		A→C	E1030A (GAA→GCA)	0.166	Yes (26.7%)
4,186,748		C→A	Q1126K (CAG→AAG)	0.236	Yes (26.1%)
4,187,115		T→C	I1248T (ATT→ACT)	0.055	Yes (3.6%)
4,310,594	rpiR	C→G	A141P (GCC→CCC)	0.027	Yes (3.8%)

## Sheet: WT
Genome Position	Gene(s)	Mutation	Region	Frequency
105,370	ftsZ	C→T	G22G (GGC→GGT)	0.025
330,802	betT / yahA	G→A	intergenic (+82/‑793)	0.02
1,877,853	yeaR	Δ1 :: IS186 (+) +6 bp :: Δ1	coding (115‑120/360 nt)	0.119	Hypothetical Protein
2,534,505	pdxK	C→T	A252V (GCA→GTA)	0.02
3,171,169	ygiN	T→G	L2L (CTT→CTG)	0.125	Quinol monooxygenase
4,155,356	argH	C→T	P162S (CCG→TCG)	0.022
4,501,666	insG / yjhB	T→C	intergenic (‑212/‑415)	0.055	Transposase/Putative Transporter
