# Supplementary material for: Multidrug-resistant bacteria compensate for the epistasis between resistances
Source: PLoS Biol. 2017 Apr 18;15(4):e2001741. doi: 10.1371/journal.pbio.2001741 (PMC5395140; doi:10.1371/journal.pbio.2001741)
Supplement: S5 Table — (XLSX) [file pbio.2001741.s013.xlsx]

## Sheet: Sheet1
Primer	Function	Sequence
ORB200	qPCR	TCTTGCCATCGGATGTGCCCAG
ORB201	reference gene rrsA	CCAGTGTGGCTGGTCATCCTCTCA
ORB202	qPCR	ACGGGGATCAAGAGAGGTCAAAC
ORB203	reference gene ssrA	CGGACGGACACGCCACTAAC
ORB210	Sequencing	CGTCGTATCCGTTCCGTTGG
ORB211	rpoB	TTCACCCGGATAACATCTCGTC
ORB214	Sequencing	ATGATGGCGGGATCGTTG
ORB215	rpsL	CTTCCAGTTCAGATTTACC
ORB290	ssDNA for mutagenesis (Pal method) rpoC_Q1126K	G*C*GCGGCAGACCACCGGTGATGTCCTTGGTACCGCCGGATTCCTTCGGAATACGCGCCAGGGTGTCACCAGAGCTGATCTGTACGCCA*T*C
ORB302	Mutagenesis	TTCGACAGAACCTTCGGCGG
ORB303	nusE	AATTATTTTATAAACGAAAATGATTACTCCTCAGGCCC
ORB306	Mutagenesis	TCCAAGATGTGCTGATATAGCTCAGTTGGTAG
ORB307	nusG	GCGTGCAAAAAGGGCATCAAGTG
ORB332	qPCR	GATCGATCAAGCAACCGCGG
ORB333	target gene nusE	GGAGATCAGAACAGTGAAGCGC
ORB334	qPCR	TGAAGGCCGCGTAGCAACG
ORB335	target gene nusG	GACCGCCACGGATTTCAACCAC
NusESeq-F	Sequencing	GCCGTCTTCTGTGAAGATACG
NusESeq-R	nusE	CTGTAGAGGCTGAAACGCCC
NusGSeq-F	Sequencing	AATGTTCCGCAAACTGCTGG
NusGSeq-R	nusG	TTTGTCGTTAACAGCGCGAC
RpoCSeq-F	Sequencing	ATCGACGGCCAGACCATTAC
RpoCSeq-R	rpoC	ATGAAGGACTCGGTTGCCAG
